# Supplementary material
Source: PubMed Central journal article supplement (PMC6451543)
Supplement: ejhpharm-2016-000980supp001.pdf [file ejhpharm-2016-000980supp001.pdf]

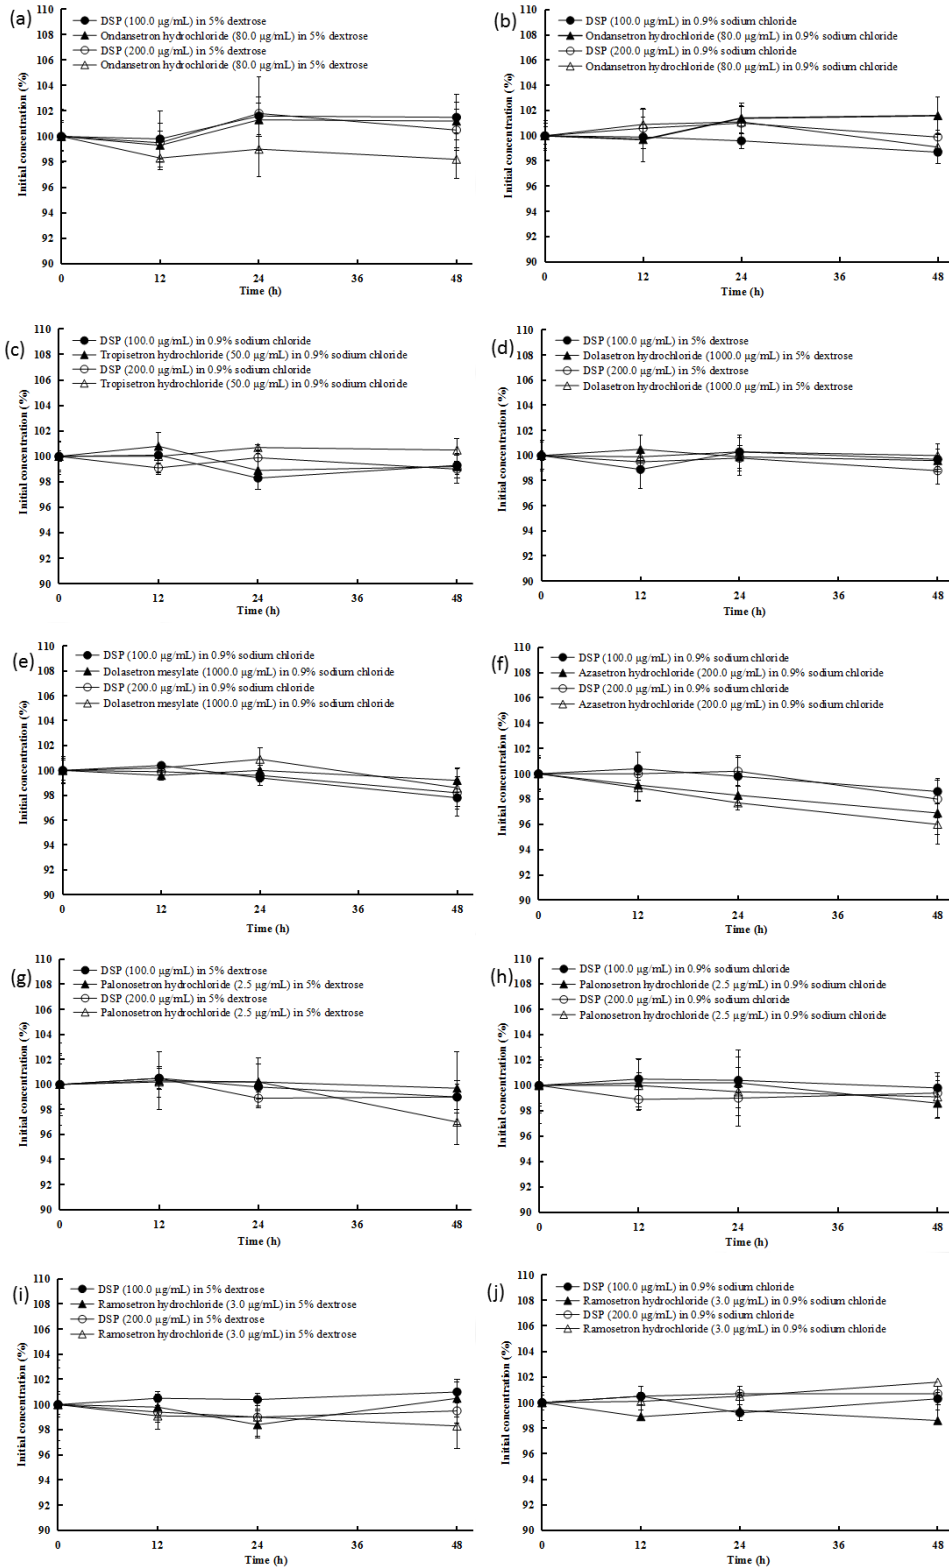

Supplemental material. Concentration of different admixtures of dexamethasone sodium phosphate (DSP) with each 5-HT<sub>3</sub>RAs in infusion solutions. (a) admixtures of DSP (100.0 µg/mL or 200.0 µg/mL) with ondansetron hydrochloride (80.0 µg/mL) in 5% dextrose, (b) admixtures of DSP (100.0 µg/mL or 200.0 µg/mL) with ondansetron hydrochloride (80.0 µg/mL) in 0.9% sodium chloride, (c) admixtures of DSP (100.0 µg/mL or 200.0 µg/mL) with tropisetron hydrochloride (50.0 µg/mL) in 0.9% sodium chloride, (d) admixtures of DSP (100.0 µg/mL or 200.0 µg/mL) with dolasetron mesylate (1000.0 µg/mL) in 5% dextrose, (e) admixtures of DSP (100.0 µg/mL or 200.0 µg/mL) with dolasetron mesylate (1000.0 µg/mL) in 0.9% sodium chloride, (f) admixtures of DSP (100.0 µg/mL or 200.0 µg/mL) with azasetron hydrochloride (200.0 µg/mL) in 0.9% sodium chloride, (g) admixtures of DSP (100.0 µg/mL or 200.0 µg/mL) with palonosetron hydrochloride (2.5 µg/mL) in 5% dextrose, (h) admixtures of DSP (100.0 µg/mL or 200.0 µg/mL) with palonosetron hydrochloride (2.5 µg/mL) in 0.9% sodium chloride, (i) admixtures of DSP (100.0 µg/mL or 200.0 µg/mL) with ramosetron hydrochloride (3.0 µg/mL) in 5% dextrose, (j) admixtures of DSP (100.0 µg/mL or 200.0 µg/mL) with ramosetron hydrochloride (3.0 µg/mL) in 0.9% sodium chloride.
